# Supplementary material for: Rapid functional activation of a horizontally transferred eukaryotic gene in a bacterial genome in the absence of selection
Source: PubMed Central journal article supplement — Nucleic Acids Res. 2019 May 20;47(12):6351–9. doi: 10.1093/nar/gkz370 (PMC6614815; doi:10.1093/nar/gkz370), 2019-05-20
Supplement: gkz370_supplemental_files.pdf [file gkz370_supplemental_files.pdf]

## SUPPLEMENTARY DATA

**Supplementary Table 1.** List of oligonucleotides used in this study.

### Primers for pZL26 vector construction

| Target sequence                     | Forward primer (5' – 3')                          | Reverse primer (5' – 3')                  |
|-------------------------------------|---------------------------------------------------|-------------------------------------------|
| <i>lacZ</i> left flanking sequence  | GTGCACCAATTGGTCGACTTTTTCCATGGATTTCCGTGACGTCTCGTTG | ATACTAGCGTGCTATGGTACCTGTTACCCGTAGGTAGTCAC |
| <i>ble-GFP</i> gene                 | ATAGCACGCTAGTATCCTTGG                             | TGTAAAGATGCTGTAACCTG                      |
| <i>nptII</i> expression cassette    | TACAGCATCTTTACAGAGCTCGCTCCCCGCCGTCGTTCAAT         | AAACAAAGCTTGCTAGATTTTGTATTTCAAATC         |
| <i>lacZ</i> right flanking sequence | TTTCACACAGGAATTCAAAAACCATGGATTCGGGATTTCCGGCGCTCCA | CTAGCAAGCTTTGTTTCTTTATGGCAGGGTGAA         |

### Primers for the generation of hybridization probes

| Gene       | Forward primer (5' – 3')   | Reverse primer (5' – 3')   |
|------------|----------------------------|----------------------------|
| <i>Ble</i> | CGGGATCCATGGCGAAGCTGACGAGC | CGGGATCCGTCCTGCTCCTCGGCCAC |

**Primers for real-time qRT-PCR and Primer of *lacZ* gene (containing integration site) for sequencing**

| <b>Gene</b> | <b>Forward primer (5' – 3')</b> | <b>Reverse primer (5' – 3')</b> |
|-------------|---------------------------------|---------------------------------|
| <i>GFP</i>  | AGCTGACCCTGAAGTTCATCTG          | TGTAGTTGTA CTCCAGCTTGTG         |
| <i>rrsA</i> | CGGTGGAGCATGTGGTTTAA            | GAAA ACTTCCGTGGATGTCAAGA        |
| <i>lacZ</i> | ATCAGCTGTTGCCCGTCTCACTG         | ACCAGACCGTTCATACAGAACTG         |
